# Supplementary material for: Allelopathic Effects of Amomum villosum Lour. Volatiles from Different Organs on Selected Plant Species and Soil Microbiota
Source: MDPI journal article supplement (doi:10.3390/plants11243550), 2022-12-16
Supplement: s1 [file s1]

**Supplementary Table S1.** Chemical composition of the volatile oils from *Amomum villosum* Lour.

| Number | Compounds                                                      | Percentage (%) |              |              |              |
|--------|----------------------------------------------------------------|----------------|--------------|--------------|--------------|
|        |                                                                | Stem           | Leaf         | Young fruit  | Whole plant  |
| 1      | E-2-Hexen-1-al                                                 | -              | 0.67         | -            | -            |
| 2      | 3-Hexen-1-ol                                                   | -              | -            | -            | 0.38         |
| 3      | Tricyclene                                                     | -              | -            | 0.20         | -            |
| 4      | Thujene                                                        | 0.61           | 0.34         | 0.13         | 0.57         |
| 5      | $\alpha$ -Pinene                                               | <b>16.26</b>   | <b>28.18</b> | 4.30         | <b>15.03</b> |
| 6      | Camphene                                                       | -              | 0.28         | 8.83         | 0.87         |
| 7      | $\beta$ -Phellandrene                                          | <b>24.65</b>   | 8.26         | -            | <b>15.14</b> |
| 8      | Sabinene                                                       | -              | -            | 1.50         | -            |
| 9      | $\beta$ -Pinene                                                | <b>28.30</b>   | <b>48.62</b> | 4.84         | <b>23.70</b> |
| 10     | $\beta$ -Myrcene                                               | 1.46           | 0.73         | 2.81         | 1.49         |
| 11     | $\alpha$ -Phellandrene                                         | -              | -            | 0.38         | 0.08         |
| 12     | Terpinene                                                      | 1.35           | 0.34         | 0.52         | 1.00         |
| 13     | <i>p</i> -Cymene                                               | 1.04           | 0.14         | 0.06         | 0.42         |
| 14     | D-Limonene                                                     | 2.15           | 2.16         | 7.75         | 3.75         |
| 15     | Eucalyptol                                                     | 0.27           | -            | 0.12         | 0.12         |
| 16     | Ocimene                                                        | -              | 0.07         | 0.02         | 0.09         |
| 17     | $\gamma$ -Terpinene                                            | 2.46           | 0.66         | 0.81         | 1.93         |
| 18     | $\beta$ -Terpineol                                             | 0.25           | -            | 0.02         | 0.08         |
| 19     | Terpinolene                                                    | 0.72           | 0.22         | 0.40         | 0.59         |
| 20     | Linalool                                                       | 0.19           | -            | 1.93         | 0.32         |
| 21     | Fenchyl alcohol                                                | -              | -            | 0.02         | 0.03         |
| 22     | 2-Cyclohexen-1-ol, 1-methyl-4-(1-methylethyl)-, <i>trans</i> - | 0.32           | -            | 0.07         | 0.19         |
| 23     | $\alpha$ -campholenal                                          | -              | -            | -            | 0.05         |
| 24     | L-Pinocarveol                                                  | -              | 0.18         | -            | 0.45         |
| 25     | 2-Cyclohexen-1-ol, 1-methyl-4-(1-methylethyl)-, <i>cis</i> -   | -              | -            | 0.06         | -            |
| 26     | Camphor                                                        | -              | 0.33         | <b>16.58</b> | 2.65         |
| 27     | Camphenhydrate                                                 | -              | -            | 0.15         | -            |
| 28     | Isoborneol                                                     | -              | -            | 0.27         | -            |
| 29     | Pinocarvone                                                    | -              | -            | -            | 0.32         |
| 30     | Borneol                                                        | -              | 0.09         | 4.51         | 0.36         |
| 31     | Terpinen-4-ol                                                  | 6.32           | 1.38         | 1.65         | 4.07         |
| 32     | $\alpha$ -Terpineol                                            | 0.72           | 0.32         | 0.44         | 0.64         |
| 33     | Myrtenal                                                       | -              | 0.37         | 0.03         | 0.87         |
| 34     | <i>trans</i> -Piperitol                                        | -              | -            | 0.03         | 0.11         |
| 35     | Verbenone                                                      | -              | -            | -            | 0.04         |
| 36     | Carveol                                                        | -              | -            | -            | 0.03         |
| 37     | Fenchyl acetate                                                | -              | -            | 0.05         | -            |
| 38     | Bornyl formate                                                 | -              | -            | 0.06         | -            |
| 39     | Carvone                                                        | -              | -            | -            | 0.03         |

|    |                                                                                |       |       |              |       |
|----|--------------------------------------------------------------------------------|-------|-------|--------------|-------|
| 40 | Bornyl acetate                                                                 | 0.46  | 1.35  | <b>38.30</b> | 4.03  |
| 41 | Myrtenyl acetate                                                               | -     | -     | -            | 0.05  |
| 42 | <i>p</i> -Mentha-1,4-dien-7-ol                                                 | -     | -     | -            | 0.05  |
| 43 | Copaene                                                                        | -     | -     | 0.15         | 0.11  |
| 44 | $\beta$ -Elemene                                                               | 1.00  | 0.08  | 0.10         | 0.59  |
| 45 | $\alpha$ -Santalene                                                            | -     | -     | 0.04         | 0.04  |
| 46 | Caryophyllene                                                                  | 1.15  | 0.42  | 0.16         | 0.98  |
| 47 | $\alpha$ -Ionone                                                               | -     | -     | -            | 0.06  |
| 48 | $\alpha$ -Bergamotene                                                          | -     | -     | 0.04         | 0.06  |
| 49 | $\beta$ -Farnesene                                                             | -     | -     | 0.04         | 0.05  |
| 50 | 1,4,7,-Cycloundecatriene, 1,5,9,9-tetramethyl-, Z,Z,Z-                         | 0.20  | 0.06  | 0.04         | 0.21  |
| 51 | Aromadendrene                                                                  | -     | -     | 0.03         | 0.17  |
| 52 | Naphthalene,1,2,3,5,6,7,8,8a-octahydro-1-methyl-6-methylene-4-(1-methylethyl)- | -     | -     | 0.02         | -     |
| 53 | $\gamma$ -Elemene                                                              | 1.94  | 0.41  | 0.29         | 1.54  |
| 54 | Cyclohexene, 1-methyl-4-(5-methyl-1-methylene-4-hexenyl)-, (S)-                | -     | -     | 0.04         | -     |
| 55 | 8-Isopropenyl-1,5-dimethyl-cyclodeca-1,5-diene                                 | -     | -     | 0.06         | 0.22  |
| 56 | Cadinene                                                                       | -     | -     | 0.15         | 0.12  |
| 57 | (-)-Spathulenol                                                                | 0.46  | -     | 0.02         | 0.28  |
| 58 | Caryophyllene oxide                                                            | 0.40  | 0.09  | 0.08         | 0.32  |
| 59 | Viridiflorol                                                                   | -     | -     | 0.05         | 0.08  |
| 60 | Naphthalene, 1,2,3,4,4a,7-hexahydro-1,6-dimethyl-4-(1-methylethyl)-            | -     | -     | 0.04         | 0.02  |
| 61 | T-Muurolol                                                                     | -     | -     | 0.07         | -     |
| 62 | $\alpha$ -Cadinol                                                              | -     | -     | 0.10         | -     |
| 63 | Ar-turmerone                                                                   | -     | -     | 0.02         | -     |
| 64 | Santalol                                                                       | -     | -     | 0.12         | -     |
| 65 | Bergamotenol                                                                   | -     | -     | 0.10         | -     |
| 66 | Farnesyl acetone                                                               | -     | -     | -            | 0.14  |
| 67 | Eicosane                                                                       | -     | -     | 0.03         | -     |
|    | Monoterpene hydrocarbons                                                       | 79.00 | 89.99 | 32.55        | 64.66 |
|    | Oxygenated monoterpenes                                                        | 8.53  | 4.02  | 64.29        | 14.49 |
|    | Sesquiterpene hydrocarbons                                                     | 4.29  | 0.97  | 1.18         | 4.11  |
|    | Oxygenated sesquiterpenes                                                      | 0.86  | 0.09  | 0.57         | 0.88  |
|    | Others                                                                         | -     | 0.67  | 0.03         | 0.38  |
|    | Total identified                                                               | 92.67 | 95.74 | 98.62        | 84.52 |
|    | Oil yield (% , v/w)                                                            | 0.15  | 0.40  | 0.50         | 0.20  |

"-" represent not detected. Bold numbers represent the percentage of chemicals more than 15% in the organ.
